# Supplementary material for: Current Psychopathological Symptoms in Children and Adolescents Who Suffered Different Forms of Maltreatment
Source: Hindawi journal article supplement (doi:10.1155/2016/8654169), 2016-01-01
Supplement: f1 [file 8654169.f1.pdf]

## Supplementary materials

### Statistical comparisons for Table 1

sPTSD vs No Psychiatric Disorders:  $X^2(1) = 12.8, p < .001$ ; sPTSD vs PTSD:  $X^2(1) = 3.85, p < .05$ ;  
sPTSD vs Externalizing Disorders:  $X^2(1) = 10.71, p < .001$ ], Emotional Abuse [sPTSD vs No  
Psychiatric Disorders:  $X^2(1) = 28.49, p < .001$ ; sPTSD vs PTSD:  $X^2(1) = 28.49, p < .001$ ; sPTSD vs  
Externalizing Disorders:  $X^2(1) = 24.2, p < .001$ ], Physical Abuse [sPTSD vs No Psychiatric  
Disorders vs:  $X^2(1) = 10.29, p < .01$ ; sPTSD vs PTSD:  $X^2(1) = 8.06, p < .01$ ; sPTSD vs  
Internalizing:  $X^2(1) = 4.77, p < .05$ ] and Neglect [sPTSD vs No Psychiatric Disorders:  $X^2(1) =$   
 $19.59, p < .001$ ; sPTSD vs PTSD:  $X^2(1) = 25, p < .001$ ; sPTSD vs Externalizing:  $X^2(1) = 11.65, p <$   
 $.001$ ].

### Statistical comparisons for Table 2

Physical vs Sexual:  $X^2(1) = 9, p < .01$ ; Physical vs Emotional:  $X^2(1) = 10.7, p < .01$ ; Physical vs  
Neglect:  $X^2(1) = 3.6, p < .05$ ]. However, in preadolescents Emotional Abuse was more frequent  
than the other forms of maltreatment [Emotional vs Sexual:  $X^2(1) = 16.9, p < .001$ ; Emotional vs  
Physical:  $X^2(1) = 14.3, p < .001$ ; Emotional vs Neglect:  $X^2(1) = 4.1, p < .05$ ].

In adolescents, the distribution of different forms of maltreatment did not differ [ $X^2(3) = 1.4, p =$   
 $.7$ ].

In preadolescents, Emotional Abuse was more frequent than in the two other groups [preadolescents  
vs preschoolers  $X^2(1) = 7.3; p < .01$ ; preadolescents vs adolescents  $X^2(1) = 33.3; p < .01$ ].

Sexual Abuse was more frequent in preschoolers than in adolescents [ $X^2(1) = 6.3; p < .01$ ].

### Statistical comparisons for Table 3

The most frequent form of maltreatment in males was Emotional Abuse [Emotional vs Sexual:

$X^2(1) = 13, p < .01$ ; Emotional vs Physical:  $X^2(1) = 7.7, p < .01$ ; Emotional vs Neglect:  $X^2(1) = 6.1, p < .01$ ]

In females, Physical Abuse was less frequent than the other forms [Physical vs Sexual:  $X^2(1) = 9, p < .01$ ; Physical vs physical:  $X^2(1) = 12.1, p < .01$ ; Physical vs Neglect:  $X^2(1) = 9.8, p < .01$ ].

Sexual Abuse was more frequent in females than in males [ $X^2(1) = 4.9; p < .01$ ].

#### **Statistical comparisons for Table 4**

In males sPTSD was more frequent than the other forms of psychiatric disorder [sPTSD vs No Psychiatric Disorders:  $X^2(1) = 32.8, p < .001$ ; sPTSD vs PTSD:  $X^2(1) = 30.4, p < .001$ ; sPTSD vs Internalizing Disorders:  $X^2(1) = 4.4, p < .05$ ; sPTSD vs Externalizing Disorders:  $X^2(1) = 9, p < .01$ ]. Moreover, both Internalizing and Externalizing Disorders were more prevalent than PTSD [Internalizing Disorders vs PTSD:  $X^2(1) = 14.3, p < .001$ ; Externalizing Disorders vs PTSD:  $X^2(1) = 9, p < .01$ ] and than No Psychiatric Disorders [Internalizing Disorders vs No Psychiatric Disorders:  $X^2(1) = 16.3, p < .001$ ; Externalizing Disorders vs No Psychiatric Disorders:  $X^2(1) = 10.8, p < .001$ ].

In females as well in males, sPTSD was the most frequent psychiatric disorder [sPTSD vs No psychiatric disorders:  $X^2(1) = 38.4, p < .001$ ; sPTSD vs PTSD:  $X^2(1) = 31, p < .001$ ; sPTSD vs Internalizing Disorders:  $X^2(1) = 14.5, p < .001$ ; sPTSD vs Externalizing Disorders:  $X^2(1) = 43.1, p < .001$ ].

In females Internalizing Disorder was more prevalent than PTSD [ $X^2(1) = 4, p < .05$ ], than Externalizing Disorders [ $X^2(1) = 11.6, p < .001$ ] and than No Psychiatric Disorders [ $X^2(1) = 8.3, p < .01$ ].

Externalizing Disorders were more frequent in males than females [ $X^2(1) = 8.9, p < .01$ ].
